# Supplementary material for: Doping and strain modulation of the electronic, optical and photocatalytic properties of the GaN/C2N heterostructure
Source: Royal Society of Chemistry journal article supplement (doi:10.1039/d4cp01836b), 2024-01-01
Supplement: d4cp01836b2.pdf [file d4cp01836b2.pdf]

# Doping and strain modulation of the electronic, optical and photocatalytic properties of the GaN/C<sub>2</sub>N heterostructure

Fu Yin<sup>a</sup>, Hui Wang<sup>a,\*</sup>, Zhengqin Zhao<sup>a</sup>, LiJia Luo<sup>a</sup>, Yongliang Tang<sup>a</sup>,

Yanbo Zhang<sup>a</sup>, Qiang Xue<sup>b</sup>

<sup>a</sup>*School of Physical Science and Technology, Southwest Jiaotong University,*

*Chengdu 610031, P.R. China*

<sup>b</sup>*School of Materials Science and Engineering, Southwest Jiaotong University,*

*Chengdu 610031, P.R. China*

## ■ Supplementary data

**Fig.S1** The refined partial density of state of GaN/C<sub>2</sub>N heterostructure.

**Fig.S2** The refined partial density of states of GaN/C<sub>2</sub>N+2P heterostructure.

**Fig.S3** The projected band diagrams of GaN/C<sub>2</sub>N heterostructure doped with (a) one P atom, (b) one As atom, and (c) two As atoms using the HSE06 method.

**Fig.S4** The optical absorption spectra of all doped GaN/C<sub>2</sub>N heterostructures, as well as the pristine monolayers of GaN and C<sub>2</sub>N, calculated using the HSE06 method.

**Fig.S5** The (a) real and (b) imaginary parts of the dielectric function of all doped GaN/C<sub>2</sub>N heterostructures, as well as the pristine monolayers of GaN and C<sub>2</sub>N, calculated using the HSE06 method.

**Fig.S6** The (a) reflectivity and (b) refractive index of all doped GaN/C<sub>2</sub>N heterostructures, as well as the pristine monolayers of GaN and C<sub>2</sub>N, calculated using the HSE06 method.

**Fig.S7** The projected band diagrams of GaN/C<sub>2</sub>N heterostructure with different compressive strains (a) -1%, (b) -2%, and (c) -3% calculated using the HSE06 method.

**Fig.S8** The projected band diagrams of GaN/C<sub>2</sub>N heterostructure with different tensile strains (a) 1%, (b) 2%, and (c) 3% calculated using the HSE06 method.

**Fig.S9** The influence of strain on the absorption spectrum of GaN/C<sub>2</sub>N heterostructure,

---

\* Corresponding author.

E-mail address: wanghui@swjtu.edu.cn (H. Wang)

calculated using the HSE06 method.

**Fig.S10** The (a) real and (b) imaginary parts of the dielectric function of GaN/C<sub>2</sub>N heterostructures with different strains, calculated using the HSE06 method.

**Fig.S11** The reflectivity (a) and refractive index (b) of GaN/C<sub>2</sub>N heterostructures with different strains, calculated using the HSE06 method.

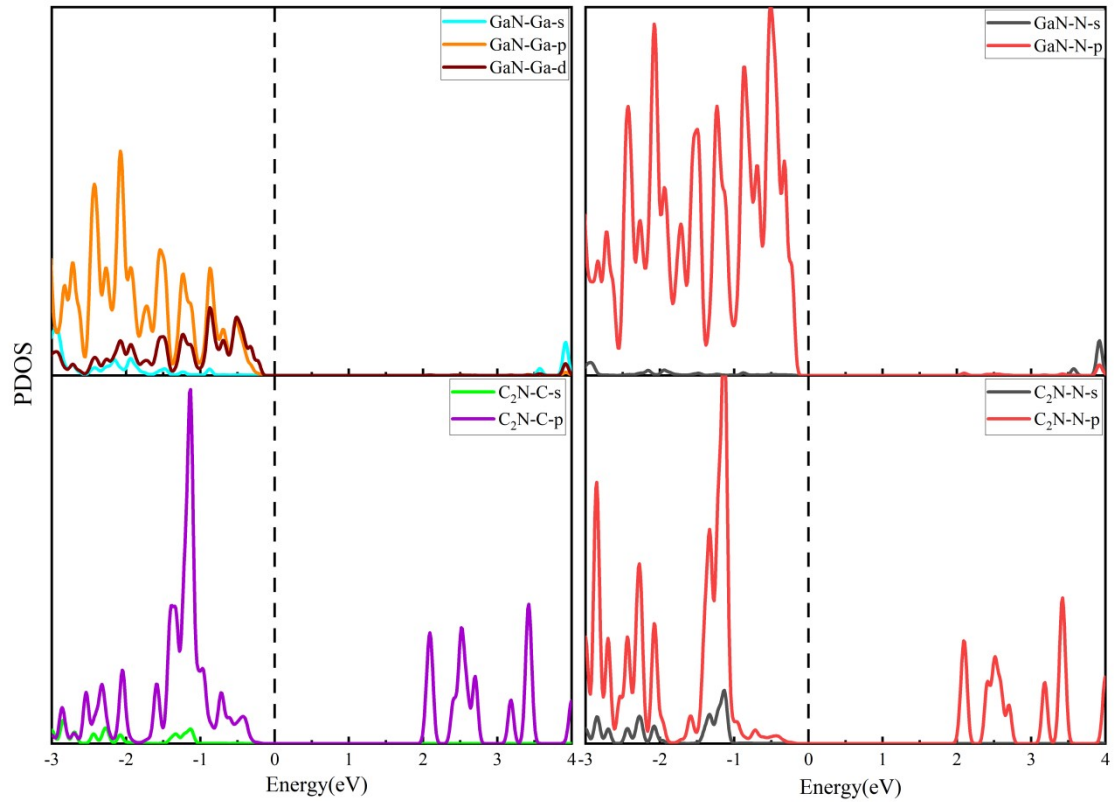

**Fig.S1** The refined partial density of state of GaN/C<sub>2</sub>N heterostructure.

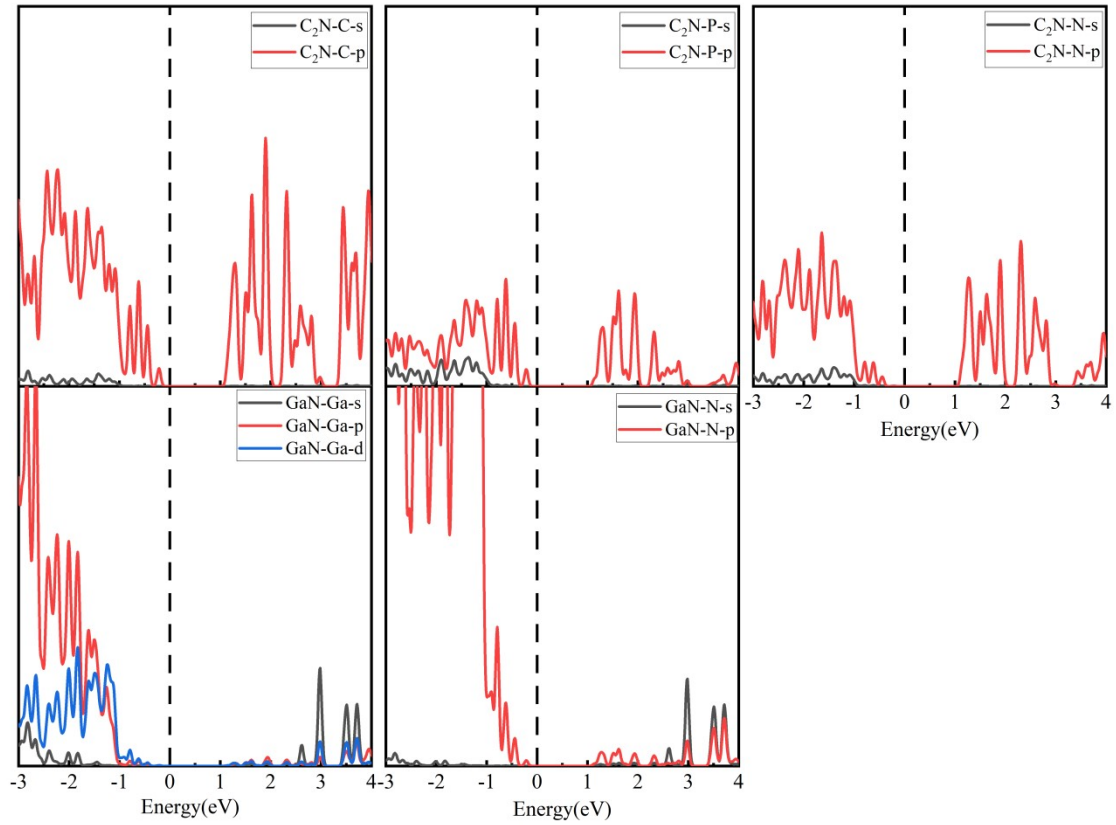

**Fig.S2** The refined partial density of states of GaN/C<sub>2</sub>N+2P heterostructure.

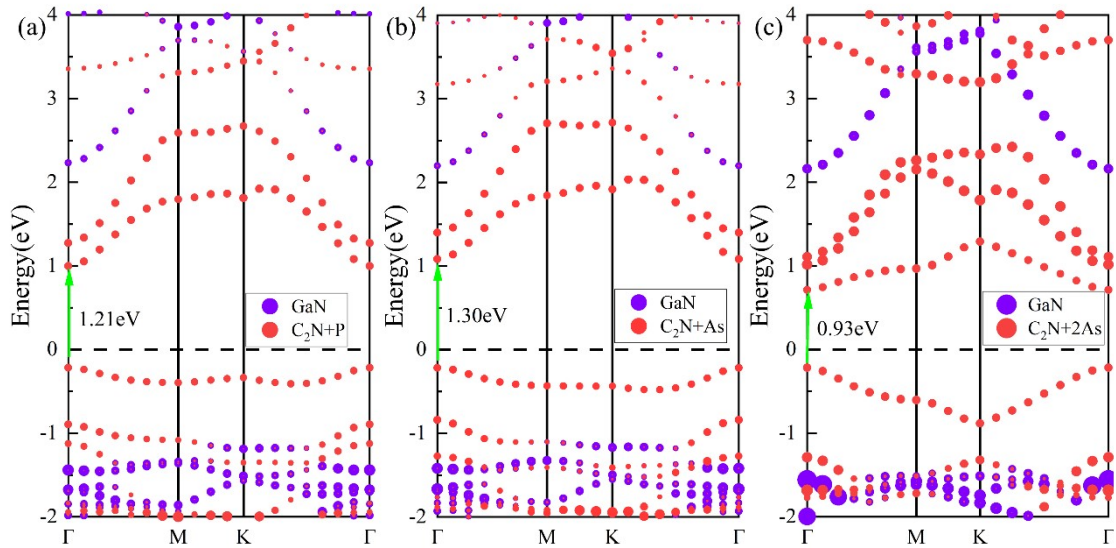

**Fig.S3** The projected band diagrams of GaN/C<sub>2</sub>N heterostructure doped with (a) one P atom, (b) one As atom, and (c) two As atoms using the HSE06 method.

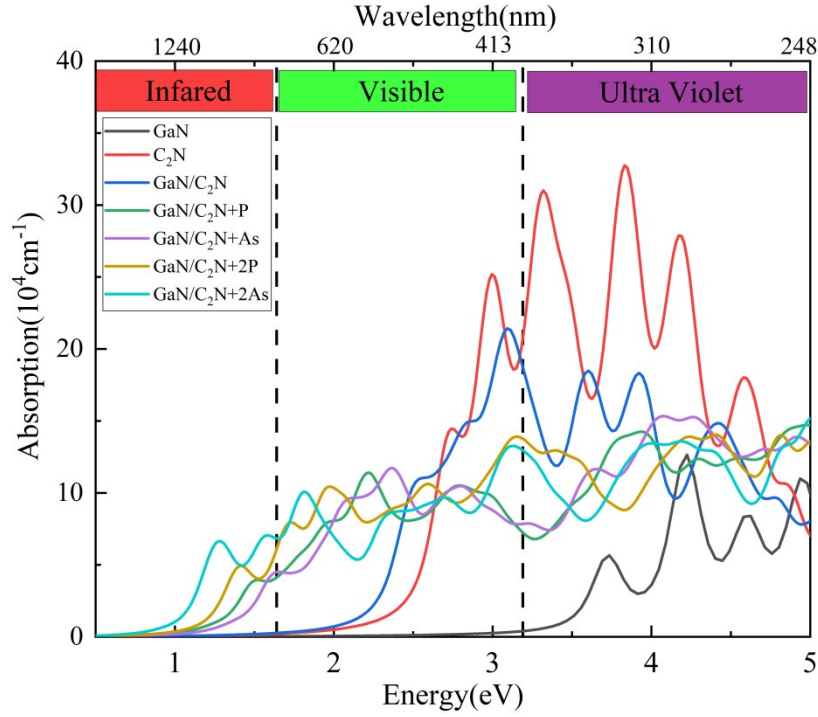

**Fig.S4** The optical absorption spectra of all doped GaN/C<sub>2</sub>N heterostructures, as well as the pristine monolayers of GaN and C<sub>2</sub>N, calculated using the HSE06 method.

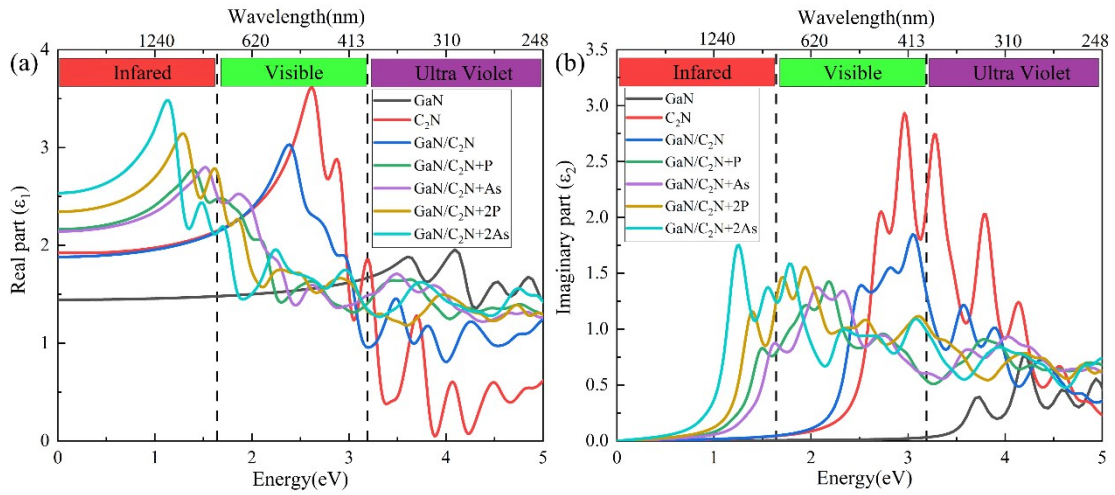

**Fig.S5** The (a) real and (b) imaginary parts of the dielectric function of all doped GaN/C<sub>2</sub>N heterostructures, as well as the pristine monolayers of GaN and C<sub>2</sub>N, calculated using the HSE06 method.

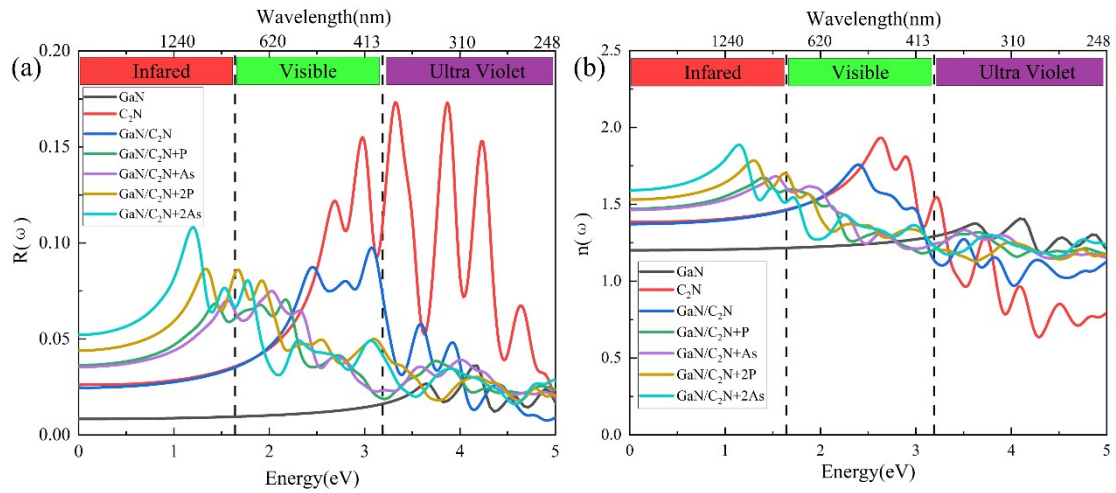

**Fig.S6** The (a) reflectivity and (b) refractive index of all doped GaN/C<sub>2</sub>N heterostructures, as well as the pristine monolayers of GaN and C<sub>2</sub>N, calculated using the HSE06 method.

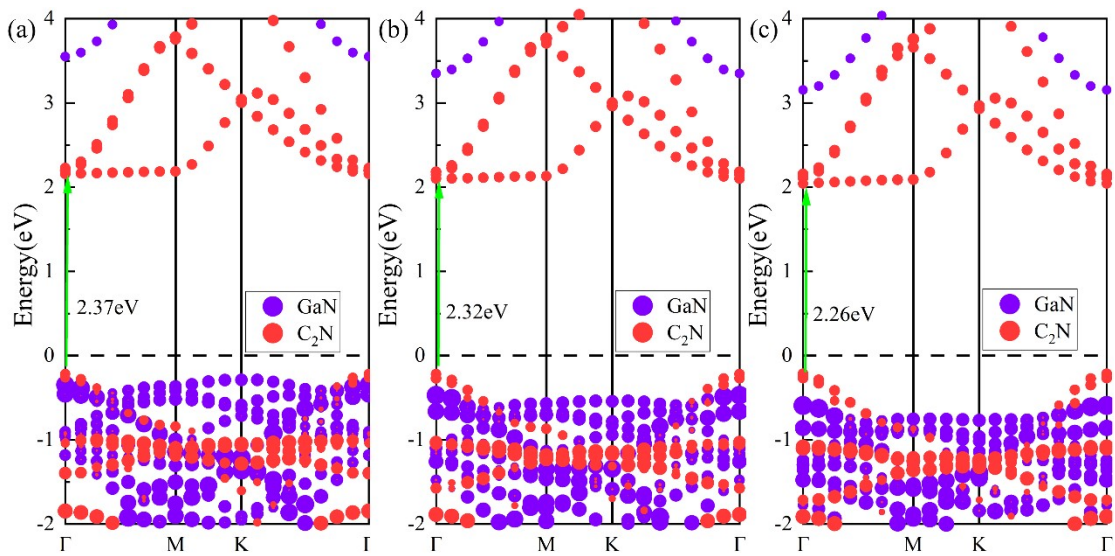

**Fig.S7** The projected band diagrams of GaN/C<sub>2</sub>N heterostructure with different compressive strains (a) -1%, (b) -2%, and (c) -3% calculated using the HSE06 method.

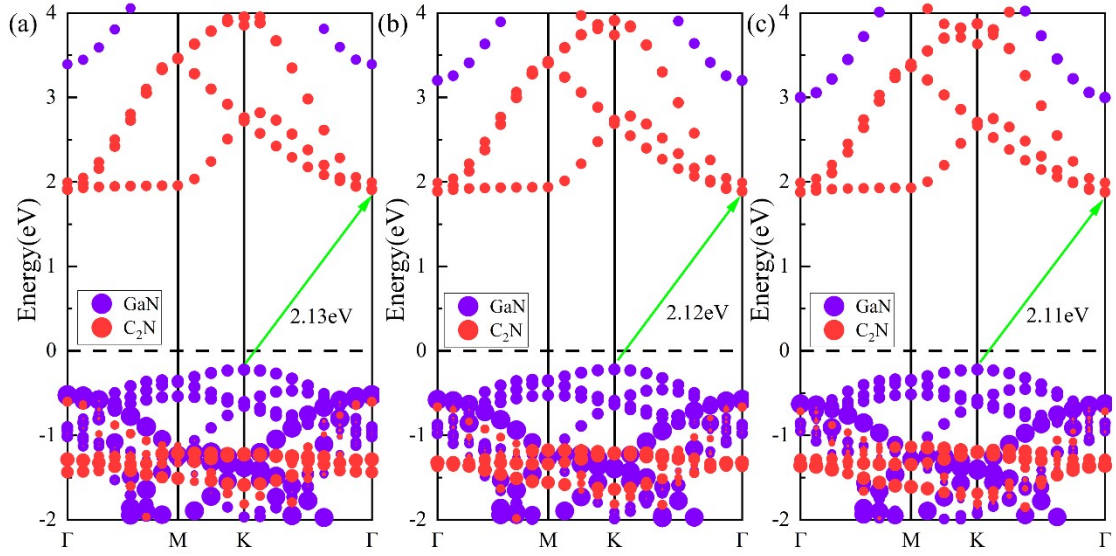

**Fig.S8** The projected band diagrams of GaN/C<sub>2</sub>N heterostructure with different tensile strains (a) 1%, (b) 2%, and (c) 3% calculated using the HSE06 method.

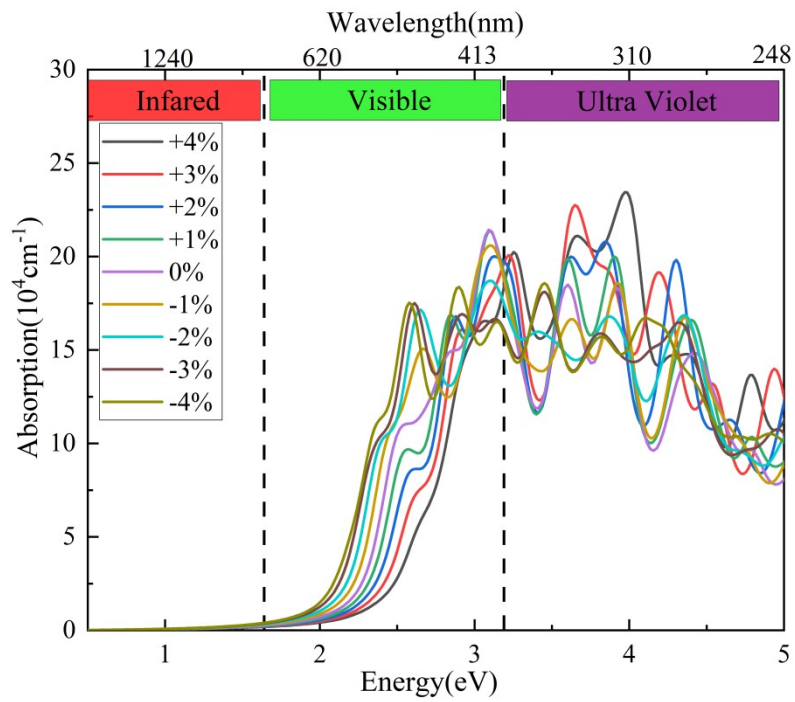

**Fig.S9** The influence of strain on the absorption spectrum of GaN/C<sub>2</sub>N heterostructure, calculated using the HSE06 method.

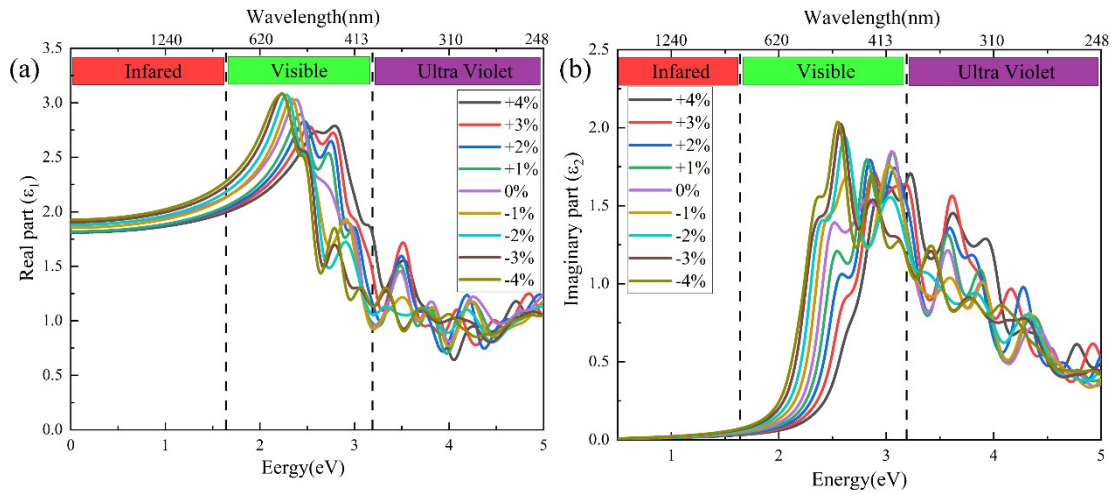

**Fig.S10** The (a) real and (b) imaginary parts of the dielectric function of GaN/C<sub>2</sub>N heterostructures with different strains, calculated using the HSE06 method.

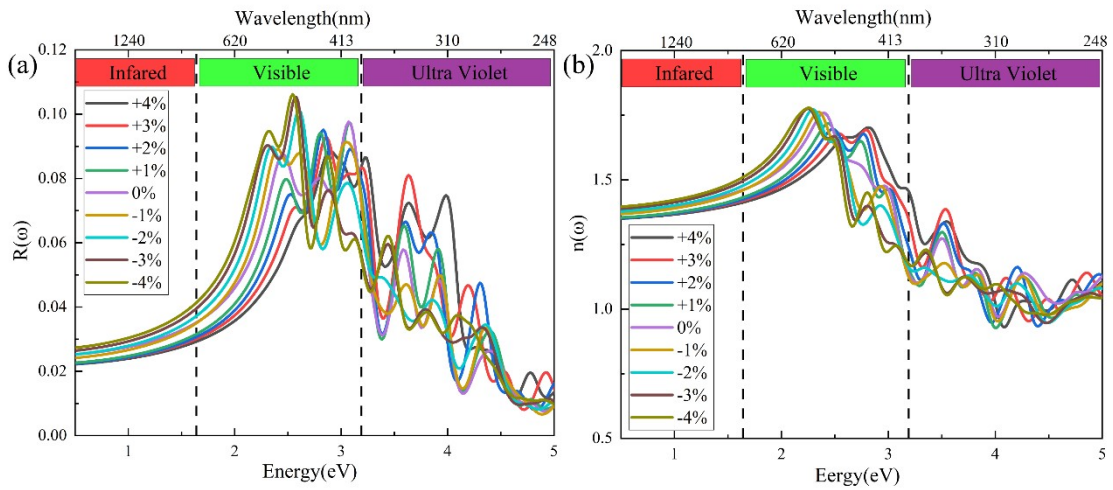

**Fig.S11** The reflectivity (a) and refractive index (b) of GaN/C<sub>2</sub>N heterostructures with different strains, calculated using the HSE06 method.
